# Supplementary material for: TLR2 Regulates Mast Cell IL-6 and IL-13 Production During Listeria monocytogenes Infection
Source: PubMed Central journal article supplement (PMC8238461; doi:10.3389/fimmu.2021.650779), 2021-06-14
Supplement: DataSheet_1.pdf [file DataSheet_1.pdf]

*Supplementary Material*

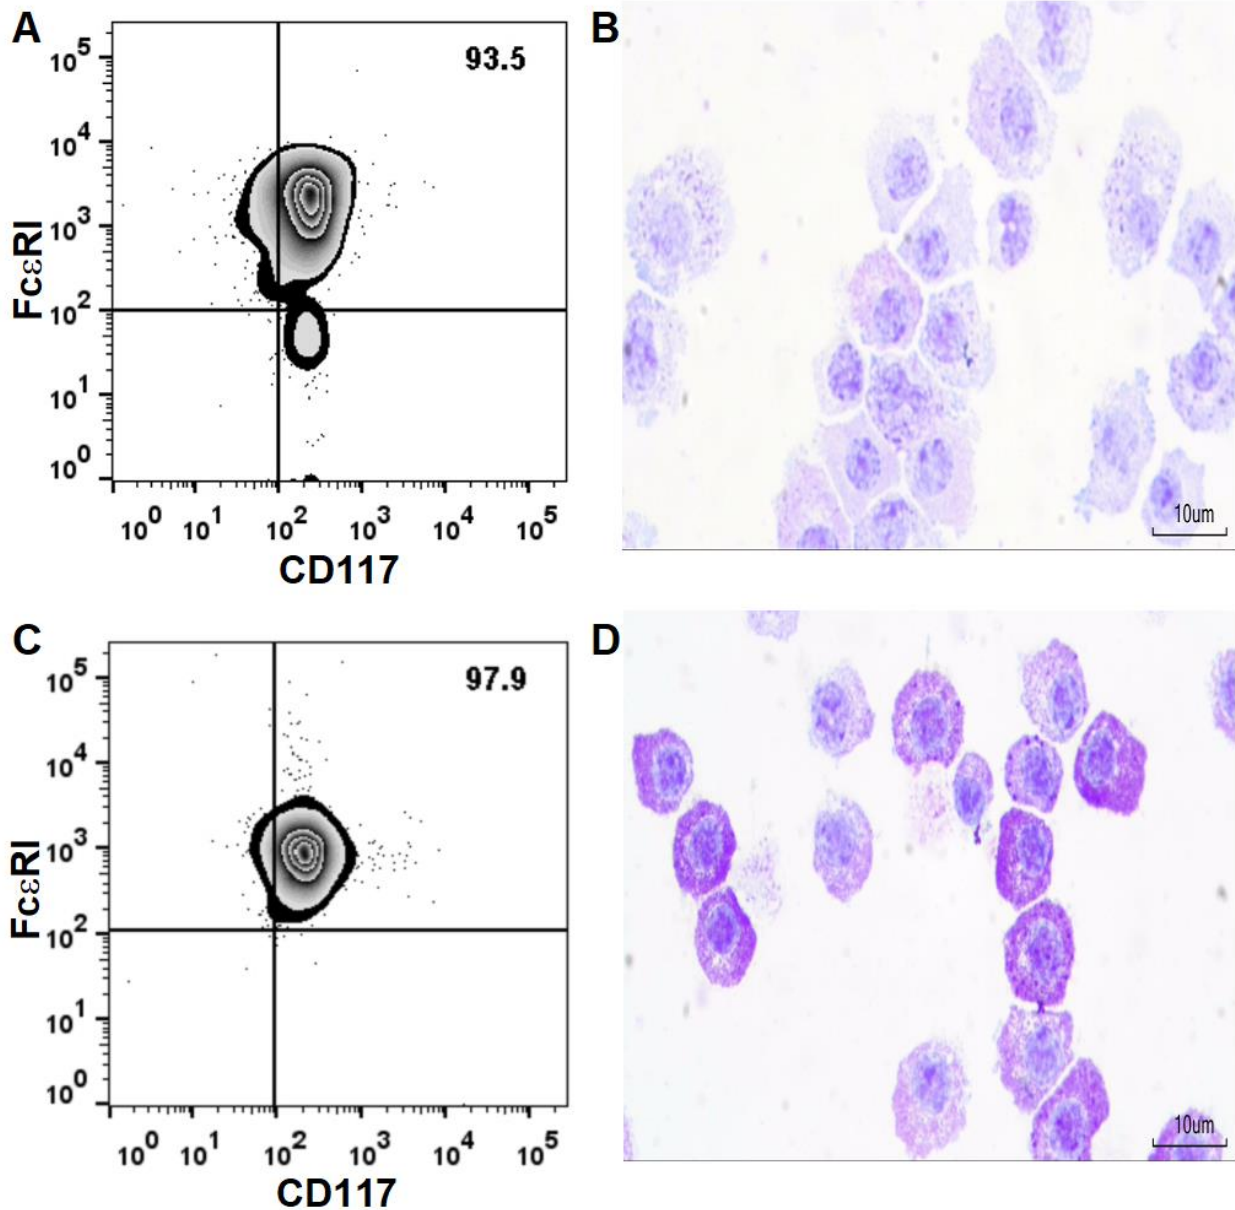

**Supplementary Figure 1. Characterization of primary cultures of bone marrow and peritoneum-derived mast cells.** Representative flow cytometry zebra plot of (A) bone marrow-derived mast cells (BMMC) and (C) peritoneum-derived mast cells (PMC). The percentage of FcεRI+CD117+ is shown. BMMC (B) and PMC (D) were stained with toluidine blue and analyzed by light microscopy. bar= 10 μm

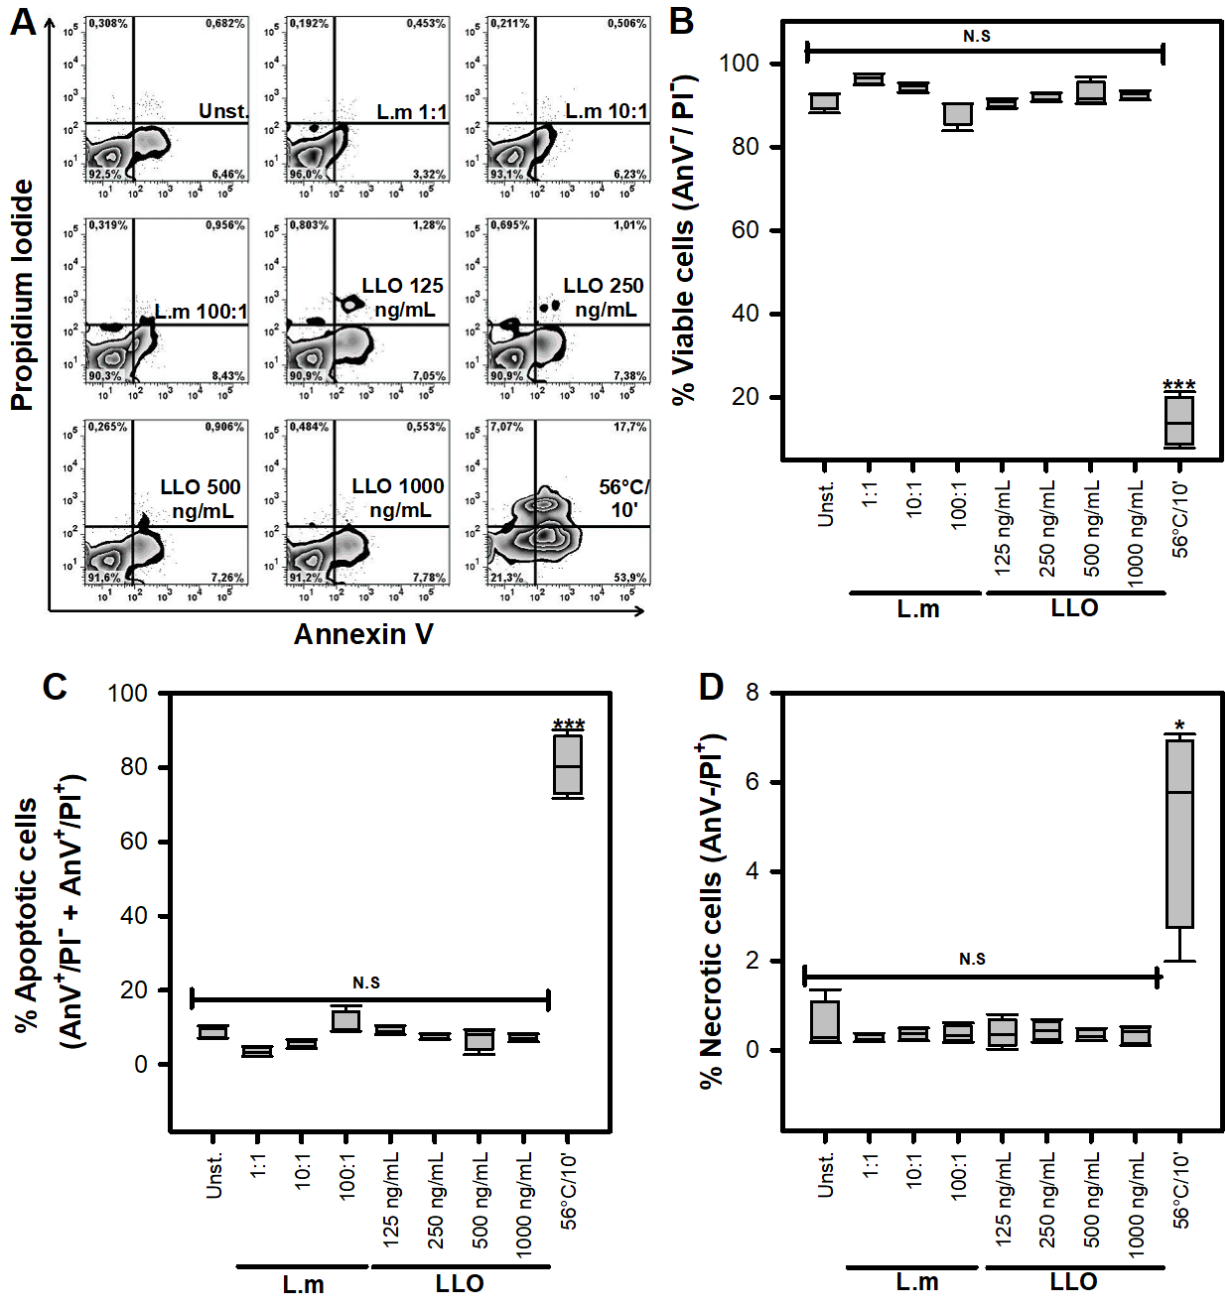

**Supplementary Figure 2. Effect of *Listeria monocytogenes* and Listeriolysin-O on the viability of mast cells.**  $2 \times 10^5$  BMDC were stimulated with L.m (MOI 1:1, 10:1 and 100:1) or LLO (125, 250, 500 and 1000 ng/mL) for 24 h. Cell viability was determined with Annexin V and propidium iodide (PI) staining and measured by flow cytometry. (A) Representative zebra-plots of BMDC stained with Annexin V and PI. (B) Percentage of viable cells (Annexin V<sup>-</sup>/PI<sup>-</sup>). (C) Percentage of total apoptotic cells represented as the sum of the percentage of early apoptotic cells (Annexin V<sup>+</sup>/PI<sup>-</sup>) and the percentage of late apoptotic cells (Annexin V<sup>+</sup>/PI<sup>+</sup>). (D) Percentage of necrotic cells (Annexin V<sup>-</sup>/PI<sup>+</sup>). (Sum of 4 independent experiments, n=4 per group; \*p<0.05; \*\*\*p<0.001; N.S.= Not Significance; comparisons were performed against unstimulated cells (Unst.). Kruskal-Wallis test).

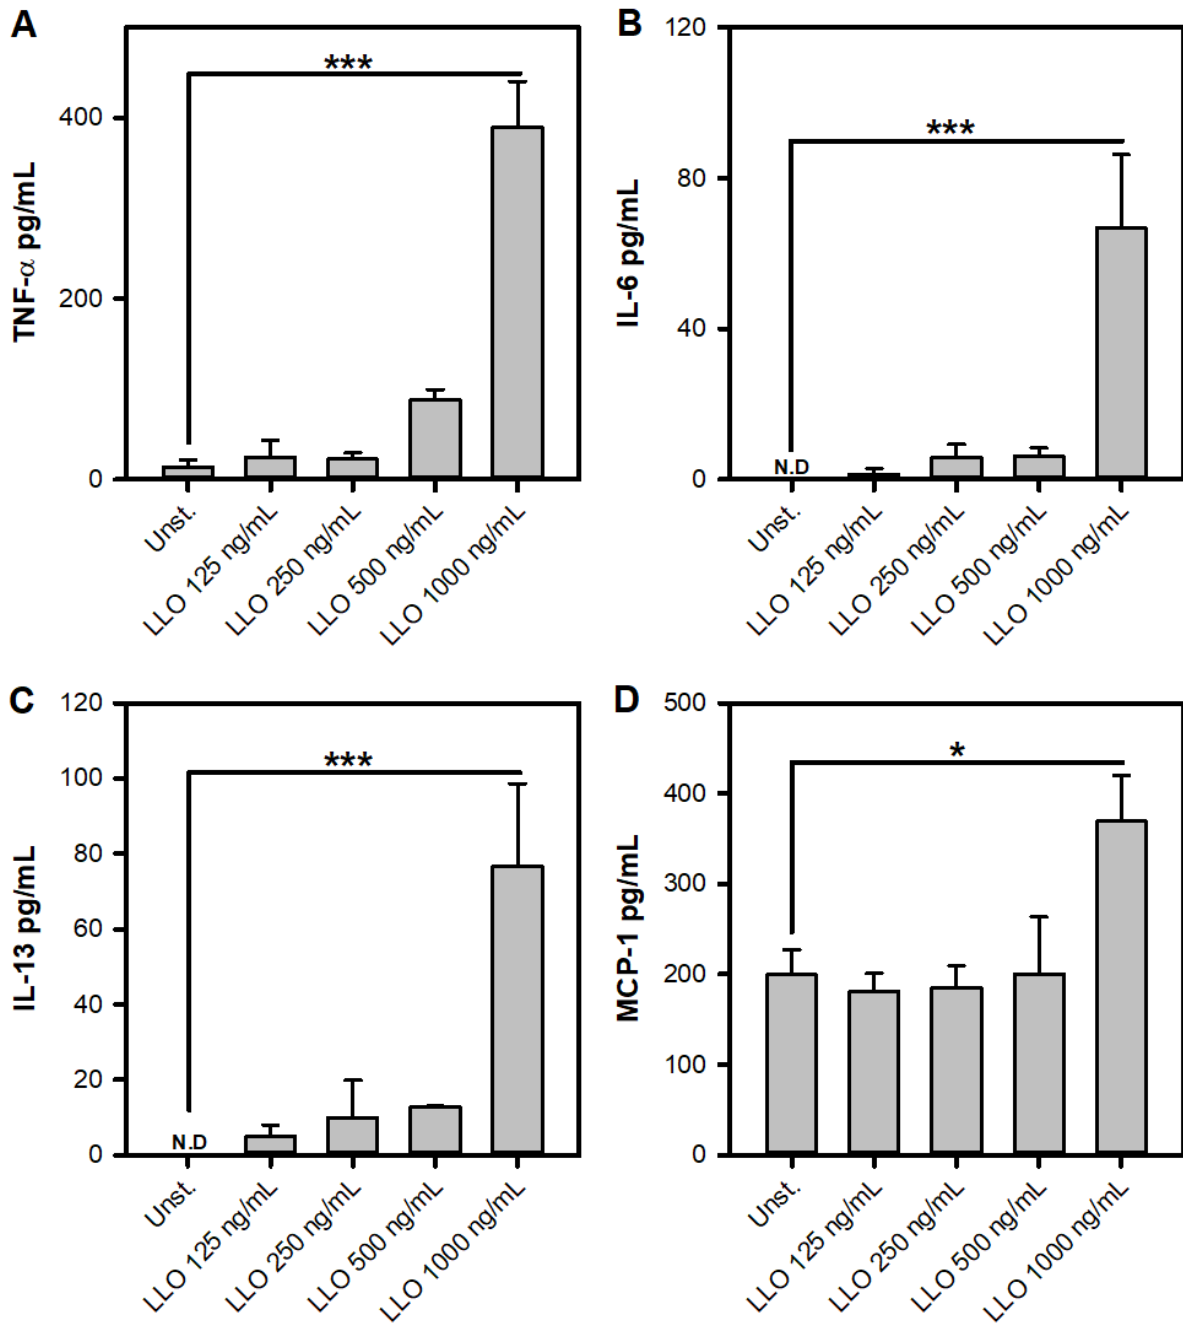

**Supplementary Figure 3. Listeriolysin-O induces *de novo* synthesis of cytokines by mast cells.**  $2.5 \times 10^5$  BMMC/ 0.25 mL of complete medium were stimulated with LLO for 24 h at the concentrations indicated. Cytokine levels were evaluated in culture supernatants by ELISA. (A) TNF- $\alpha$ , (B) IL-6, (C) IL-13 and (D) MCP-1. (Sum of 4 independent experiments, n=4 per group and for each mediator; \*p<0.05; \*\*\*p<0.001; N.D= Not detected; One Way ANOVA test).

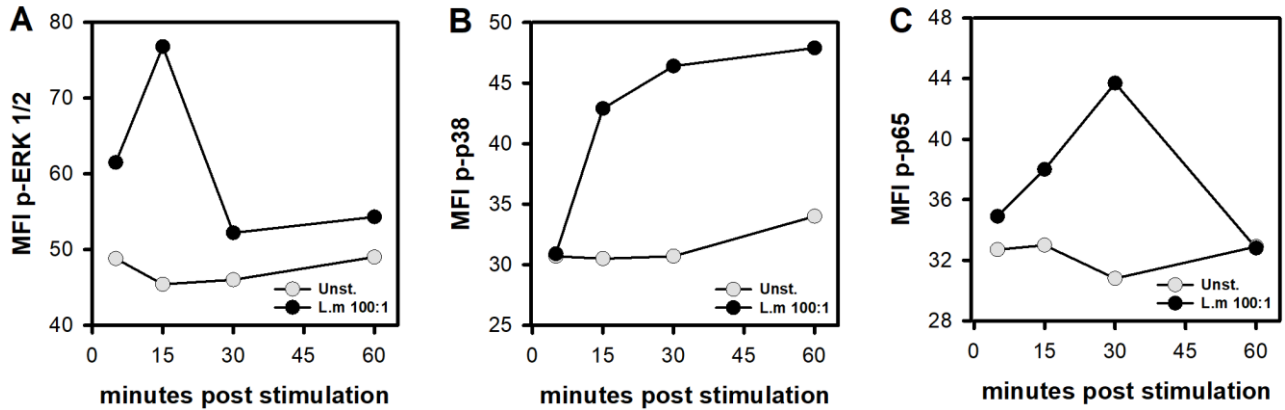

**Supplementary Figure 4. Kinetic of protein phosphorylation in response to *Listeria monocytogenes* in mast cells.**  $2.5 \times 10^5$  BMMC/0.25 mL of complete medium were stimulated with L.m (MOI 100:1) for different times to determine the phosphorylation of (A) ERK 1/2, (B) p38 and (C) p65 by flow cytometry. The graphs show the median fluorescence intensity (MFI).

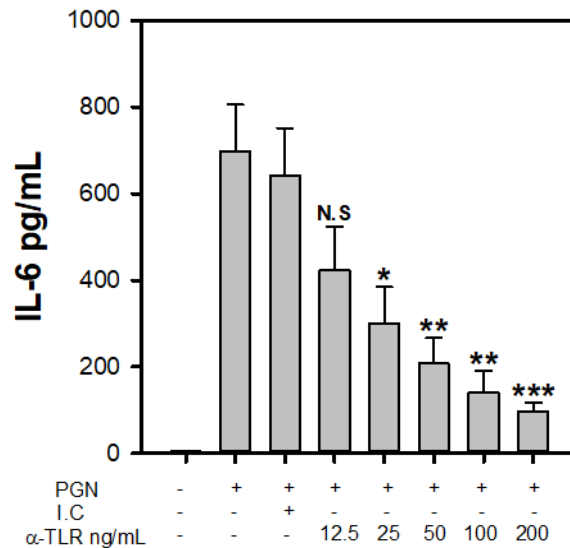

**Supplementary Figure 5. Efficiency of antibody-mediated TLR2 inhibition.**  $2.5 \times 10^5$  BMMC/0.25 mL of complete medium were pre-incubated with anti-TLR2 at the concentrations indicated for 30 minutes and then were stimulated with *Staphylococcus aureus* peptidoglycan (PGN) at 10  $\mu$ g/mL for 24 h. IL-6 level was evaluated in culture supernatants by ELISA. (Sum of 4 independent experiments, n=4 per group; \*p<0.05; \*\*p<0.01; \*\*\*p<0.001; N.S= Not Significance; comparisons were performed against cells stimulated with PGN and treated with Isotype Control (I.C). One Way ANOVA test).
